# Supplementary material
Source: publisher figshare collection journal article supplement (https://tandf.figshare.com/ndownloader/files/15025694)
Supplement: Supplementary file 1 [file 15025694]

Supplementary material 3: methodological data

| **Author** | **Exclusion criteria** | **Data collection period** | **Definition of PTSD** | **Physical health outcomes measured measurement type)** | **Other mental health outcomes investigated** | **PTSD length** |
| --- | --- | --- | --- | --- | --- | --- |
| Agorastos, et al., 2013 | - History of any physical or mental comorbidities - History of alcohol or other substance abuse - BMI diverging from norms - Pathological chest x-ray or ECG. | NR | CAPS (DSM-IV-TR) | HRV (ECG)  HR (LF/HF ratio) (ECG)  HR (root mean square of subsequent differences/standard deviation of the NN intervals) (ECG)  BMI (NR) | Depression | NR |
| Bersani et al., 2016 | - history of alcohol dependence within the past 8 months - history of drug abuse or dependence within the past year - lifetime history of any psychiatric disorder with psychotic features, bipolar disorder or obsessive-compulsive disorder - Those who were currently exposed to recurrent trauma or have been exposed to a traumatic event within the past 3 months - Subjects with prominent suicidal or homicidal ideation - neurologic disorder or systemic illness affecting central nervous system function - history of hepatitis - history of anaemia, recent blood donation in the past 2 months - subjects on medication who were not stable for 2+ months on psychiatric medication, anticonvulsants, antihypertensive medication or sympathomimetic medication - subjects who were classified with a moderate of severe traumatic brain injury on the Ohio State University TBI identification Method short form - subjects who experienced loss of consciousness for>10 minutes | NR | SCID; CAPS (DSM-IV) | Clinical Hypertension (NR)  Inflammatory conditions (NR)  Diabetes Mellitus (NR) | DSM-IV Axis 1 disorders | Mean 77.33 months (± 25.17) since trauma (Discovery sample)  Mean 51.42 months ± 24.96) since trauma |
| Blessing et al., 2017 | - History of alcohol dependence within the past 8 months - history of drug abuse or dependence within the past year - Lifetime history of any psychiatric disorder with psychotic features, bipolar disorder or obsessive-compulsive disorder - Exposure to trauma within the past 3 months - Suicidal/homicidal ideation - neurological disorder or systemic illness affecting CNS - Anaemia or blood donation in past 2 months - Changes to psychiatric, anticonvulsants, antihypertensive or sympathomimetic medication in the last 2 months - moderate or severe TBI   loss of consciousness >10 minutes | NR | SCID; CAPS (NR) | SBP (NR)  DBP (NR)  HR (NR)  Cardiovascular diseases (acute coronary syndrome; stroke; peripheral vascular disease) (self-report)  HDL (NR)  LDL (NR)  Triglycerides (NR)  Hypertensive medication (NR)  BMI (NR)  Smoking (NR) | Major Depressive Disorder (SCID) | >3 months |
| Burg et al., 2017 | - Implausible BP values - Hypertension diagnosis, received prescription for antihypertensive or had their first BP reading in hypertensive range before and on day of first BP measurement - Missing sex, ethnicity or baseline BMI data | September 2001-January 2010 | Diagnosis (ICD-9: 309.81) | Hypertension (ICD-9-C 401; prescription of anti-hypertensive medication; BP recorded in the hypertensive range)  DBP (NR)  SBP (NR) | Major Depression;Substance Use Disorder | 1 month-8 years |
| Buta et al., 2018 | - no or only 1 BMI measurement available - unknown race/ethnicity - implausible BMI measurements (<11, >70) | October 2001-January 2009 | ICD-9-CM | BMI  BMI (overweight)  BMI (obsese) | Major Depression ;Substance Use Disorder | NR |
| Caska et al., 2014 | - History of Coronary Heart Disease - Taking medication that would affect cardiovascular reactivity (e.g. beta blockers) - Active mania, psychosis, suicidality, homicidality, or alcohol/drug dependence within last 3 months. - Controls only: Axis 1 disorders | NR | CAPS (DSM-IV-TR) | SBP (BP monitor; upper non-dominant arm)  DBP (BP monitor; upper non-dominant arm)  HR (ECG) | Depression  Anxiety | NR |
| Cohen et al., 2009 | None | October 2001-September 2008 | Diagnosis (ICD-9) | Tobacco use (ICD-9)  Hypertension (ICD-9)  Hyperlipidaemia (ICD-9)  Obesity (ICD-9)  Diabetes Mellitus (ICD-9) | Depression; Anxiety disorder; Adjustment disorder; Alcohol Use Disorder; Substance Use Disorder; Other Psychiatric Diagnoses | NR |
| Frayne et al., 2011 | None | April 2006-March 2007 | Diagnosis (ICD-9: 309.81) | | Acute Myocardial infraction (ICD-9) | | --- | | Aortic, peripheral and visceral artery aneurysms (ICD-9) | | Aortic, peripheral arterial embolism or thrombosis (ICD-9) | | Cardiac arrest, ventricular fibrillation (ICD-9) | | Cardiac dysrhythmias (ICD-9) | | Circulatory diseases (ICD-9) | | Conduction disorders (ICD-9) | | Congestive heart failure; non-hypertensive (ICD-9) | | Coronary Atherosclerosis, other heart disease (ICD-9) | | Heart Valve Disorders (ICD-9) | | Hemorrhoids (ICD-9) | | Hyperlipidaemia (ICD-9) | | Hypertension (ICD-9) | | Hypertension with complications, secondary hypertension (ICD-9) | | Hypotension and other miscellaneous circulatory conditions (ICD-9) | | Other and ill-defined heart disease (ICD-9) | | Other diseases of veins, lymphatics (ICD-9) | | Peri-;Endo-;myocarditis; cardiomyopathy (except TB, STD) (ICD-9) | | Peripheral and visceral Atherosclerosis (ICD-9) | | Phlebitis; thrombophlebitis and thromboembolism (ICD-9) | | Pulmonary Heart Disease (ICD-9) | | Overweight/Obese (ICD-9) | | Diabetes (ICD-9) | | Hematologic diseases (ICD-9) | | stress-related disorders (ICD-9); other (non-PTSD) conditions (ICD-9) | >1 year |
| Ginsberg et al., 2010 | - mTBI - Any neurological disorder - history of PTSD, depression, alcohol or substance abuse prior to OIF/OEF - History of seizure disorder - acetylcholine esterase inhibitor/neuroleptic medication use - active substance abuse - lifetime history of major depression, bipolar, psychosis, panic and/or obsessive compulsive disorders - cardiovascular disease | NR | CAPS (NR) | HRV power (HRV monitor)  HRV coherence (HRV monitor)  HRV VLF (HRV monitor)  HRV LF (HRV monitor)  HRV HF (HRV monitor) | Depression (Zung Depression Scale); Anxiety (Spielberger State-Trait Anxiety Inventory | NR |
| Japuntich et al., 2016 | None | June 2009 | PCL-M (NR) | Tobacco use (self-report) | none | NR |
| Kirby et al., 2008 |  |  | CAPS (NR) | Tobacco use (Fagerstrom Test for Nicotine Dependence) | DSM-IV Axis 1 disorders | NR |
| Linqvist et al., 2014 | - History of alcohol dependence within the past 8 months - drug abuse (excluding nicotine) in past year - lifetime history of psychiatric disorder with psychotic features, bipolar disorder, obsessive compulsive disorder - exposure to trauma within last 3 months - suicidal or homicidal ideation - neurological disorder or systemic illness affecting CNS - Anaemia or blood donation in past 2 months - subjects who were not on stable psychiatric, anticonvulsant, antihypertensive or sympathomimetic medications - moderate or severe TBI - Experience of loss of consciousness for >10 minutes | NR | CAPS (DSM-IV) | CRP (Latex-enhanced immunoturbidimetric assay)  Interferon-Gamma (Latex-enhanced immunoturbidimetric assay)  Interleukin-1 (Latex-enhanced immunoturbidimetric assay)  Interkeukin-6 (Latex-enhanced immunoturbidimetric assay)  Interleukin-10 (Latex-enhanced immunoturbidimetric assay)  Tumor Necrosis Factor (Latex-enhanced immunoturbidimetric assay)  Tobacco use (NR)  BMI (NR)  Waist to hip ratio  Pro-inflammatory cytokine score (Latex-enhanced immunoturbidimetric assay) | Depression (BDI-II) | >3 months |
| Linqvist et al., 2017 | - History of alcohol dependence within the past 8 months - drug abuse (excluding nicotine) in past year - lifetime history of psychiatric disorder with psychotic features, bipolar disorder, obsessive compulsive disorder - exposure to trauma within last 3 months - suicidal or homicidal ideation - neurological disorder or systemic illness affecting CNS - Anaemia or blood donation in past 2 months - subjects who were not on stable psychiatric, anticonvulsant, antihypertensive or sympathomimetic medications - moderate or severe TBI - Experience of loss of consciousness for >10 minutes | NR | CAPS (DSM-IV) | High Sensitivity C-Reactive Protein (Latex-enhanced immunoturbidimetric assay)  Interferon-Gamma (Latex-enhanced immunoturbidimetric assay)  Interleukin-10 (Latex-enhanced immunoturbidimetric assay)  Interleukin-6 (Latex-enhanced immunoturbidimetric assay)  Tumor Necrosis Factor-Alpha (Latex-enhanced immunoturbidimetric assay)  Tobacco use (self report/plasma cotinine levels)  BMI (NR)  Pro-inflammatory cytokine score (Latex-enhanced immunoturbidimetric assay) | Depression (BDI-II) | >3 months |
| Nazarian et al., 2012 | None. | April 2006-March 2007 | Diagnosis (ICD-9) | Cardiovascular diseases (ICD-9)  Hypertension (ICD-9)  Chest pain (ICD-9)  Hemorrhoids (ICD-9) | Substance use disorders (ICD-9) | NR |
| Paulus et al., 2013 | None. | January 2008-January 2010 | Diagnosis (NR) | DBP (NR)  SBP (NR)  HR (NR) | Depression (NR); Anxiety (NR); Mood disorders (NR); Substance abuse (NR) | NR |
| Ray, Pyne & Gevirtz, 2017 | - Daytime benzodiazepine or beta-blockers use   Anticholinergic and tricyclic antidepressant use | NR | CAPS (DSM-IV) | HRV (ECG)  SDNN (ECG)  HF (ECG)  RMSSD (ECG) | Depression | NR |
| Tan et al., 2009 | None. | NR | Diagnosis (NR) | HRV (ECG) | None | NR |
